# Supplementary material
Source: Research Square preprint supplement (doi:10.21203/rs.3.rs-9578428/v1)
Supplement: Supplementary file 1 [file 64938723c7b2484b6b13b600.docx]

**Tables and figures**

| **Variable** | **n (%) or mean ± SD / median [IQR]** |
| --- | --- |
| Maternal BMI (kg/m²) | 24.2 [21.8-28.5] |
| Gestational age at examination (weeks) | 32.7 ± 2.3 |
| Fetal sex |  |
| • Male | 109 (75.7) |
| • Female | 35 (24.3%) |
| Laterality of urinary tract dilatation |  |
| • Unilateral | 106 (73.6%) |
| • Bilateral | 38 (26.4%) |
| Anteroposterior renal pelvic diameter (APRPD, mm) | 15.0 [11.8–21.0] |
| Hydroureter | 67 (46,5%) |
| Postnatal diagnosis |  |
| • Upper urinary tract obstruction (UUTO) | 96 (66.6%) |
| • Lower urinary tract obstruction (LUTO) | 15 (10.4%) |
| • Vesicoureteral reflux | 4 (2.8%) |
| • Duplex collecting system | 17 (11.8%) |
| • Multilevel obstruction | 7 (4.9%) |
| • Normal postnatal findings (healthy) | 5 (3.5%) |

Table 1. Characteristics of the study population (n = 144 fetuses)

|  | Statistic | Cortico-medullary differentiation K value | Hyperchogenicity of the parechyma - K value | Presence of cortical cysts - K value | Grading score (ONEN)-  ICC | Abnormal dilated bladder - K value | Bladder keyhole sign-  K value | Abnormal thickened bladder wall - K value |
| --- | --- | --- | --- | --- | --- | --- | --- | --- |
| A/B/C/D | Fleiss k –  ICC | 0,35* | 0,28 * | 0,06 (p0,07) | 0,60* | 0,31* | 0,19* | 0,29* |
| A/ B/ C | Fleiss k –  ICC | 0,33* | 0,30* | 0,02  (p0,7) | 0,56* | 0,25* | 0,15* | 0,28* |
| A/ B/ D | Fleiss k –  ICC | 0,44* | 0,27 * | 0,06  (p0,22) | 0,55* | 0,39* | 0,22* | 0,25* |
| B/ C/ D | Fleiss k –  ICC | 0,28 * | 0,18 * | 0,09  (0,06) | 0,59* | 0,30* | 0,25* | 0,40* |
| A/C/D | Fleiss k –  ICC | 0,32* | 0,33* | 0,08 (p 0,07) | 0,66* | 0,28* | 0,14 * | 0,23* |
| A/ B | Cohen k- weighted k | 0,50* | 0,31* | 0,06  (p0,16) | 0,48* | 0,31* | 0,19 * | 0,26 * |
| A /C | Cohen k- weighted k | 0,30* | 0,45* | 0,03  (P0,6) | 0,67* | 0,23* | 0,09  (p0,12) | 0,23 * |
| A/ D | Cohen k- weighted k | 0,45* | 0,35 * | 0,14 (p0,08) | 0,60* | 0,41* | 0,24 * | 0,24 * |
| B/ C | Cohen k- weighted k | 0,37* | 0,21 * | 0,12 * | 0, 55* | 0,29 * | 0,30 * | 0,49 * |
| B/ D | Cohen k- weighted k | 0,37* | 0,21 * | 0,06 (p0,27) | 0,57* | 0,46 * | 0,3 0* | 0,31 * |
| C/ D | Cohen k- weighted k | 0,28* | 0,22 * | 0,15 * | 0,67* | 0,24 * | 0,17 * | 0,28* |

Table 2. Inter-operator agreement in US features. Overall agreement and sub-analysis among different observers. When indicated with (*) p value is <0,05.
